# Supplementary material for: Low-Temperature Terpolymerizable Benzoxazine Monomer Bearing Norbornene and Furan Groups: Synthesis, Characterization, Polymerization, and Properties of Its Polymer
Source: MDPI journal article supplement (doi:10.3390/molecules28093944), 2023-05-07

## *Supporting Information*

# **Low-temperature Terpolymerizable Benzoxazine Monomer Bearing Norbornene and Furan Groups: Synthesis, Characterization, Polymerization and Properties of Its Polymer**

Yin Lu <sup>1</sup>, Yaliang Peng <sup>1</sup>, Yi Yang <sup>1</sup>, Jiahao Liu<sup>2</sup> and Kan Zhang <sup>1,\*</sup>

<sup>1</sup>Research School of Polymeric Materials, School of Materials Science and Engineering,  
Jiangsu University, Zhenjiang 212013, China

<sup>2</sup>School of Mechanical Engineering, Jiangsu University, Zhenjiang 212013, China

\*: To whom correspondence should be addressed:

Kan Zhang: zhangkan@ujs.edu.cn

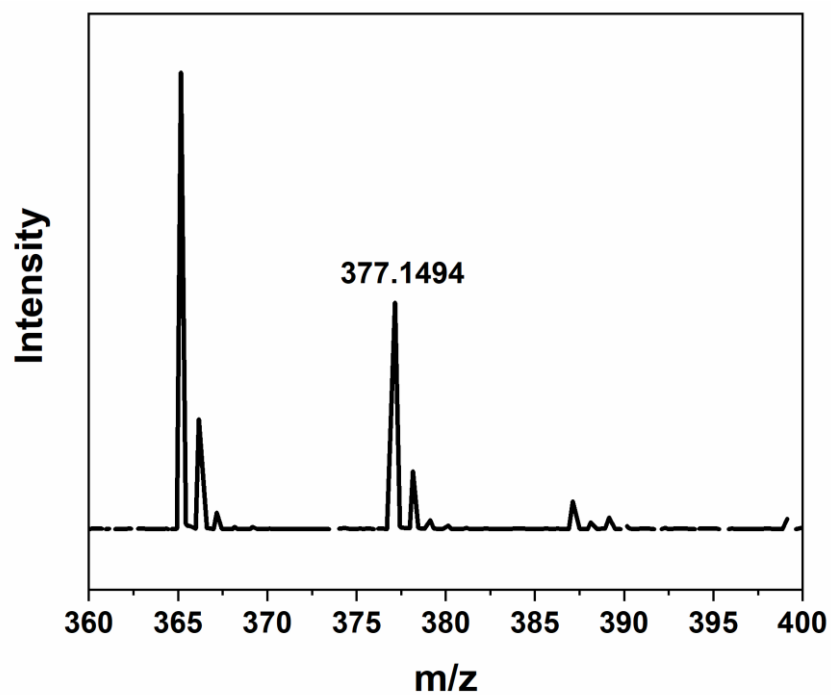

Figure S1. HR-MS spectrum of *o*HPNI-fa.

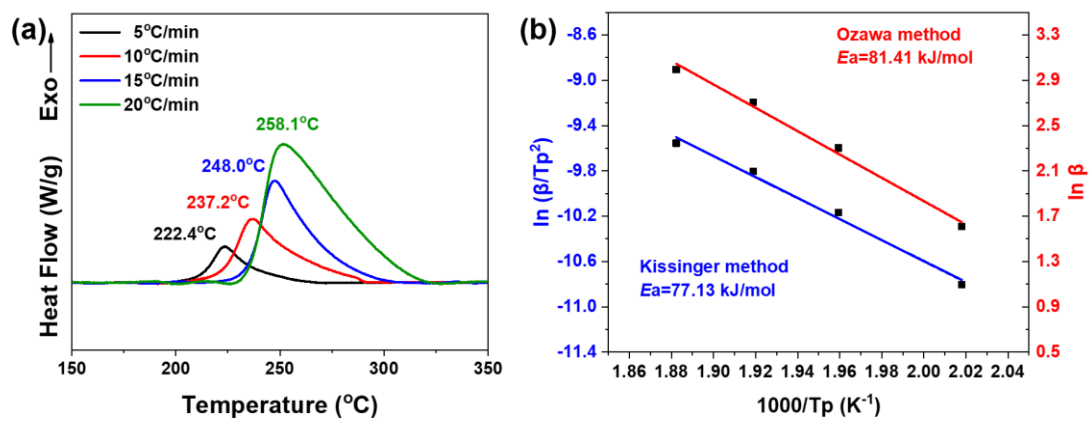

Figure S2. (a) DSC thermograms of **PH-fa** at different heating rates.

(b) Representations of the calculation of activation energy for **PH-fa**.

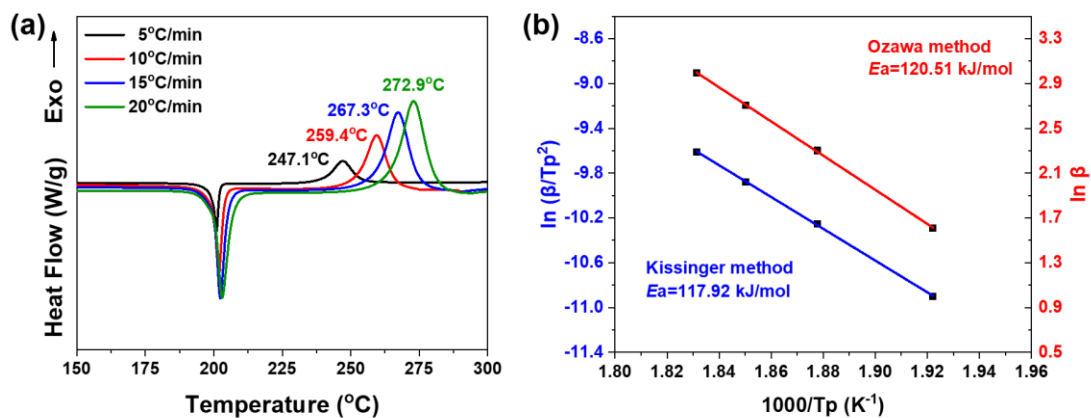

**Figure S3.** (a) DSC thermograms of **oHPNI-a** at different heating rates.

(b) Representations of the calculation of activation energy for **oHPNI-a**.

<sup>1</sup>H NMR spectrum of **PH-fa**

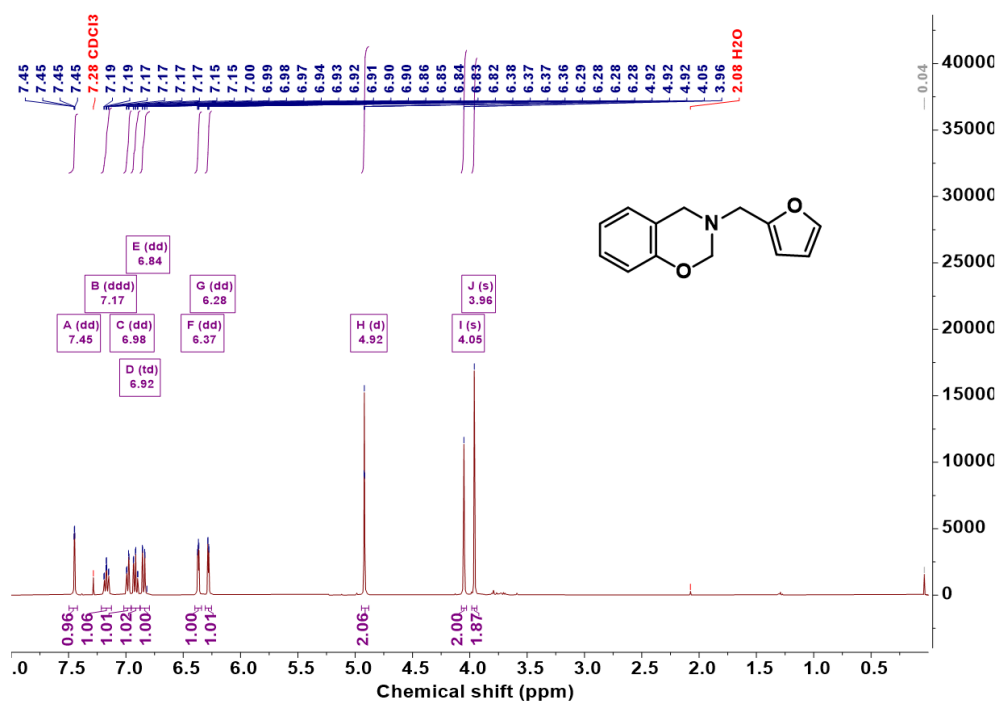

$^1\text{H}$  NMR spectrum of *o*HPNI-a

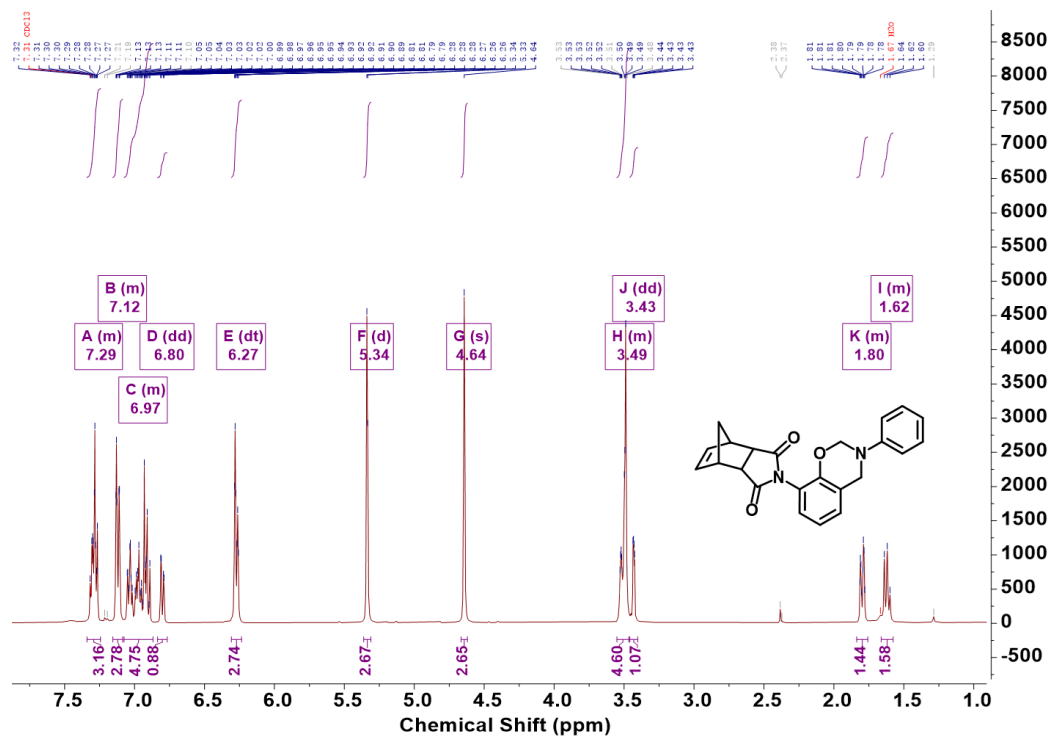

Supplement: s1 [file s1]
